# Supplementary material for: Metabolomics of Duodenal Juice for Biliary Tract Cancer Diagnosis
Source: MDPI journal article supplement (doi:10.3390/cancers15174370), 2023-09-01
Supplement: s1 [file s1]

Supplement Table S1

| Patient characteristics                  |                     |
|------------------------------------------|---------------------|
| Age, median (range), y                   | 70 (27-86)          |
| Sex, n (%)                               |                     |
| Male                                     | 52 (51)             |
| Female                                   | 50 (49)             |
| Details of disease, n (%)                |                     |
| <u>Malignant disease</u>                 |                     |
| Pancreatic ductal adenocarcinoma         | 46 (45.1)           |
| Intraductal papillary mucinous carcinoma | 2 (2)               |
| Metastatic pancreatic cancer             | 1 (1)               |
| <u>Benign disease</u>                    |                     |
| Intraductal papillary mucinous neoplasm  | 19 (18.7)           |
| Pancreatic cyst                          | 10 (9.8)            |
| Acute/Chronic pancreatitis               | 7 (6.8)             |
| Neuroendocrine tumor                     | 7 (6.8)             |
| No abnormality in workup imaging         | 7 (6.8)             |
| IgG4-related disease                     | 3 (3)               |
| CA19-9, median (range) U/ml              | 33.5 (2.1-32882161) |

Supplement Figure S1

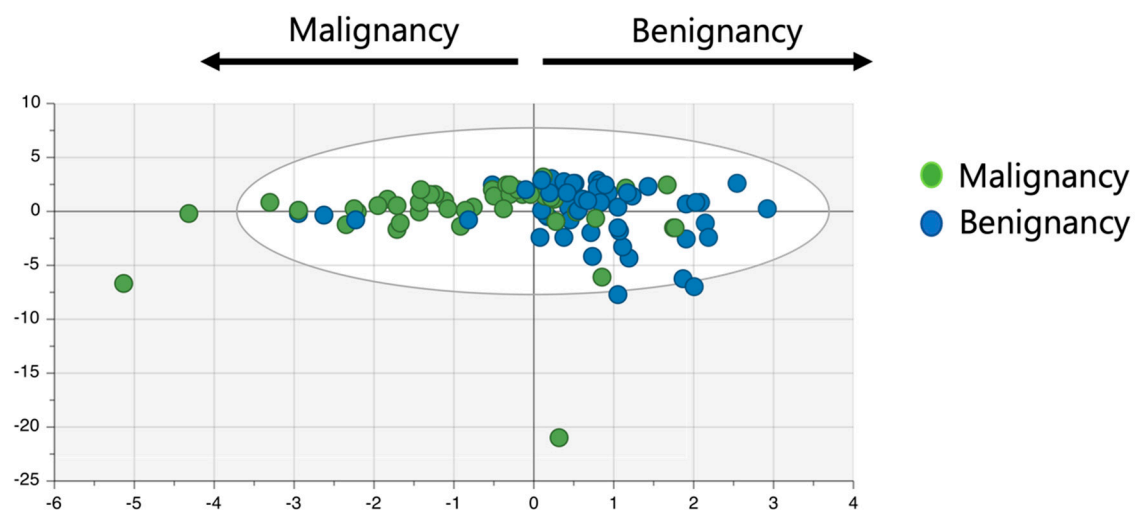

To analyze the NMR data and to establish the prediction model for pancreatic malignant disease, we applied OPLS-DA multivariate analysis to the NMR data. The majority of the benign and malignant samples appear clustered in their respective regions with only a few overlaps between them.

Supplement Figure S2

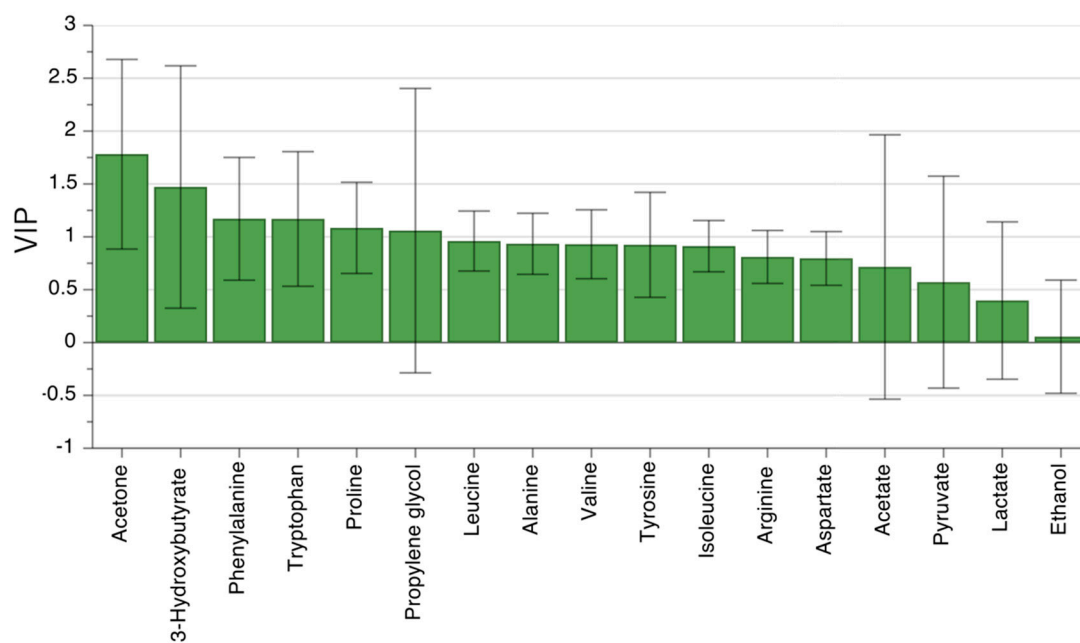

VIP-values larger than 1.0 indicate important, which were acetone, 3-hydroxybutyrate, phenylalanine, tryptophan, proline, and propylene glycol. Each bar with lines represents the mean with a 95% confidence interval. VIP, variable importance in the project.

Supplement Figure S3

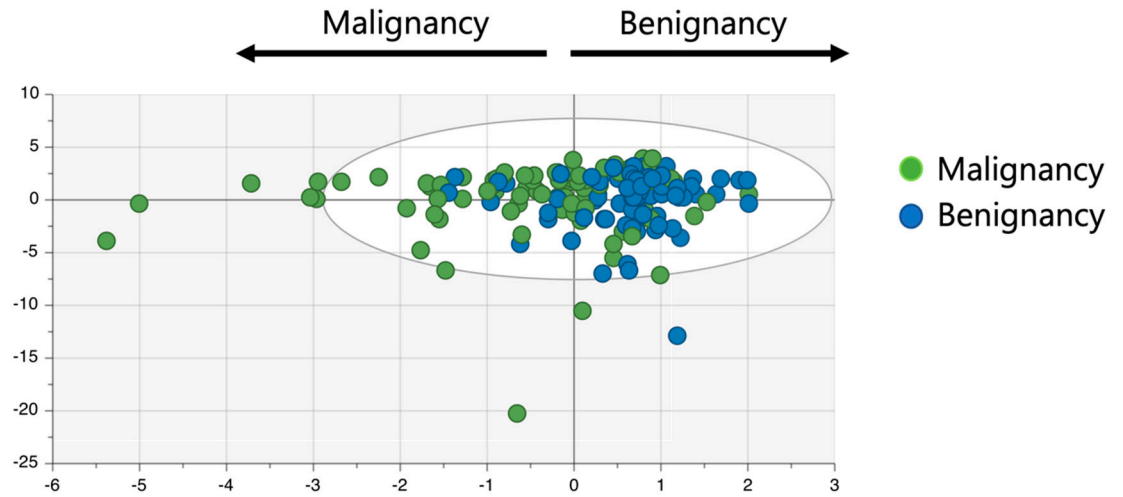

To analyze the NMR data and to establish the prediction model for pancreaticobiliary malignant disease, we applied OPLS-DA multivariate analysis to the NMR data. The majority of the benign and malignant samples appear clustered in their respective regions with only a few overlaps between them.

Supplement Figure S4

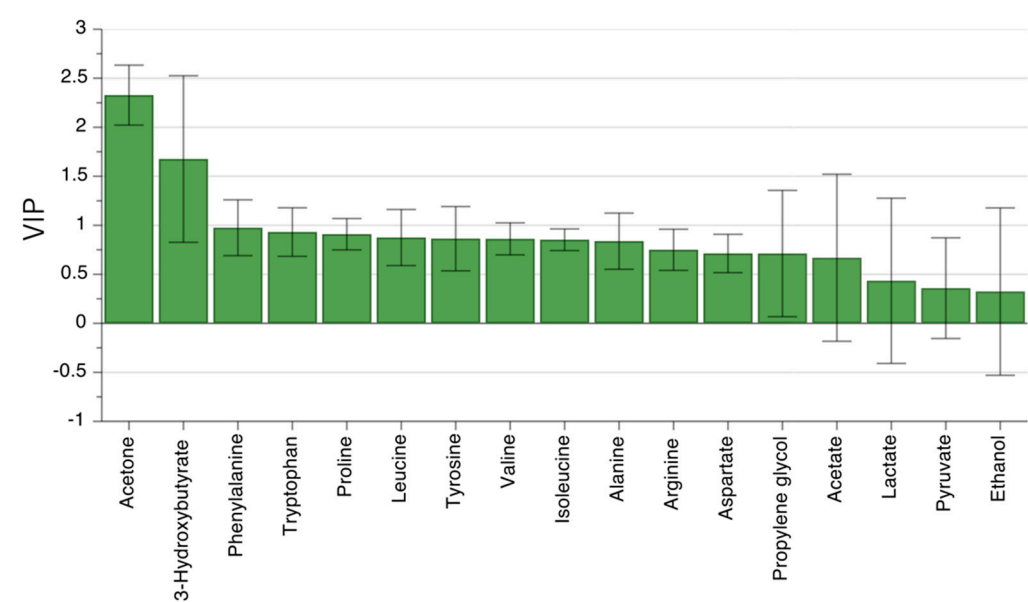

VIP-values larger than 1.0 indicate important, which were acetone and 3-hydroxybutyrate. Each bar with lines represents the mean with a 95% confidence interval. VIP, variable importance in the project.
